# Supplementary material for: Chemistry-intuitive explanation of graph neural networks for molecular property prediction with substructure masking
Source: PubMed Central journal article supplement (PMC10160109; doi:10.1038/s41467-023-38192-3), 2023-05-04
Supplement: 41467_2023_38192_MOESM1_ESM.pdf [file 41467_2023_38192_MOESM1_ESM.pdf]

# Supplementary Information

## **Chemistry-intuitive explanation of graph neural networks for molecular property prediction with substructure masking**

Zhenxing Wu<sup>1,2</sup>, Jike Wang<sup>1,2,3</sup>, Hongyan Du<sup>1,2</sup>, Dejun Jiang<sup>1,2</sup>, Yu Kang<sup>1</sup>, Dan Li<sup>1</sup>, Peichen Pan<sup>1</sup>, Yafeng Deng<sup>2</sup>, Dongsheng Cao<sup>4,\*</sup>, Chang-Yu Hsieh<sup>1,\*</sup>, Tingjun Hou<sup>1,\*</sup>

<sup>1</sup>Innovation Institute for Artificial Intelligence in Medicine of Zhejiang University, College of Pharmaceutical Sciences, Zhejiang University, Hangzhou 310058, Zhejiang, P. R. China

<sup>2</sup>CarbonSilicon AI Technology Co., Ltd, Hangzhou 310018, Zhejiang, P. R. China

<sup>3</sup>National Engineering Research Center for Multimedia Software, School of Computer Science, Wuhan University, Wuhan 430072, Hubei, P. R. China.

<sup>4</sup>Xiangya School of Pharmaceutical Sciences, Central South University, Changsha 410004, Hunan, P. R. China

**Supplementary Table 1.** The performance of the consensus models on the test sets.

| Model     | Type       | Metric         | Performance |
|-----------|------------|----------------|-------------|
| BBBP_MW   | regression | R <sup>2</sup> | 0.9906      |
| BBBP_LogP | regression | R <sup>2</sup> | 0.9829      |
| BBBP_TPSA | regression | R <sup>2</sup> | 0.9997      |
| BBBP_HBDs | regression | R <sup>2</sup> | 0.9923      |

**Supplementary Table 2.** The details of the four datasets.

| Dataset      | Type           | Data capacity | Positive sample size | Negative sample size |
|--------------|----------------|---------------|----------------------|----------------------|
| ESOL         | regression     | 1111          | —                    | —                    |
| Mutagenicity | classification | 7672          | Mutagens: 4309       | Nonmutagens: 3363    |
| hERG         | classification | 9876          | Blockers: 5090       | Nonblockers: 4786    |
| BBBP         | classification | 1859          | BBB+: 1433           | BBB-: 426            |

**Supplementary Table 3.** The detailed information of different datasets.

| Category     | Description                                                                                                                                                                                                                                                                                                                                                                                                                                                                             | The number of molecules |
|--------------|-----------------------------------------------------------------------------------------------------------------------------------------------------------------------------------------------------------------------------------------------------------------------------------------------------------------------------------------------------------------------------------------------------------------------------------------------------------------------------------------|-------------------------|
| ESOL         | Small dataset consisting of water solubility data for 1111 compounds <sup>1</sup> . The duplicated molecules and the molecules with conflicting label values are excluded.                                                                                                                                                                                                                                                                                                              | 1111                    |
| Mutagenicity | The training set for model building was collected from four papers. The data set for external validation was extracted from the Web site of Lazar toxicity predictions. The entire database was prepared as following. First, apart from the four false SMILES strings, duplicate molecules were removed from the five sources by using canonical SMILES. Second, molecules without clear E or Z configuration were removed. Third, inorganic compounds were omitted from the data set. | 7672                    |

|      |                                                                                                                                                                                                                                                                                                                                                                                                                                                                                                                         |      |
|------|-------------------------------------------------------------------------------------------------------------------------------------------------------------------------------------------------------------------------------------------------------------------------------------------------------------------------------------------------------------------------------------------------------------------------------------------------------------------------------------------------------------------------|------|
|      | <p>The last step was to eliminate the tautomers and compounds with molecular weight less than 40 or more than 800 in the data set. When doing the data set curation, we followed one principle. For a given compound, if the experimental mutagenicity data varied in different sources, the compound was cleared out. For compounds without defined steric configuration or tautomers, if the experimental mutagenicity data was alike, then only one structure was kept, and the others were deleted.<sup>2</sup></p> |      |
| hERG | <p>The original chemicals with experimental IC<sub>50</sub> values are collected from a publication<sup>3</sup> and ChEMBL database. Molecules with IC<sub>50</sub> ≤ 10 μM are classified as hERG blockers, and molecules with IC<sub>50</sub> &gt; 10 μM are classified as hERG nonblockers. Inorganic compounds, noncovalent complexes and mixtures are removed from the data set. The duplicated molecules and the molecules with conflicting label values were excluded.</p>                                       | 9876 |
| BBBP | <p>The dataset is from ADMET lab 2.0.<sup>4</sup><br/>           Category 0: BBB-; Category 1: BBB+;<br/>           The molecules were divided into BBB+ and BBB-classes with logBB ≥ -1 and logBB &lt; -1, respectively.</p>                                                                                                                                                                                                                                                                                           | 1859 |

**Supplementary Table 4.** The canonical SMILES of the compounds for analysis.

| Molecule          | Canonical SMILES                                              |
|-------------------|---------------------------------------------------------------|
| <b>Compound 1</b> | <chem>CC1CCC(C(C1)O)C(C)C</chem>                              |
| <b>Compound 2</b> | <chem>COc1ccc(C(O)(c2cncnc2)C2CC2)cc1</chem>                  |
| <b>Compound 3</b> | <chem>Nc1c(C(=O)O)cc([N+](=O)[O-])c2c1C(=O)c1cccc1C2=O</chem> |
| <b>Compound 4</b> | <chem>Cc1ccc(N)cc1[N+](=O)[O-]</chem>                         |
| <b>Compound 5</b> | <chem>COc1cc([N+](=O)[O-])ccc1N</chem>                        |

|                    |                                                                                                             |
|--------------------|-------------------------------------------------------------------------------------------------------------|
| <b>Compound 6</b>  | <chem>[N-]=[N+]=Nc1ccc(F)c([N+](=O)[O-])c1</chem>                                                           |
| <b>Compound 7</b>  | <chem>O=[N+](c1cc2c(cccc2)c2cccc21)[O-]</chem>                                                              |
| <b>Compound 8</b>  | <chem>NCc1ccc(F)c(C2CCN(C(=O)c3ccc(-c4nc(-c5cccs5)no4)c3)CC2)c1</chem>                                      |
| <b>Compound 9</b>  | <chem>NCc1ccc(F)c(C2CCN(C(=O)c3cc(C(=O)O)cc(-c4nc(-c5cccs5)no4)c3)CC2)c1</chem>                             |
| <b>Compound 10</b> | <chem>NCc1ccc(F)c(C2CCN(C(=O)c3cc(C(N)=O)cc(-c4nc(-c5cccs5)no4)c3)CC2)c1</chem>                             |
| <b>Compound 11</b> | <chem>COc1ccc(CCN2CCC(Cc3ccccc3OCCF)CC2)cc1</chem>                                                          |
| <b>Compound 12</b> | <chem>FCCOc1cccc1CCC1CCN(Cc2cccc2)CC1</chem>                                                                |
| <b>Compound 13</b> | <chem>FCCOc1cccc1CCN1CCN(Cc2cccc2Cl)CC1</chem>                                                              |
| <b>Compound 14</b> | <chem>FCCOc1cccc1CCN1CCN(Cc2cccc2)CC1</chem>                                                                |
| <b>Compound 15</b> | <chem>CCn1nc(Cc2ccc(C#N)cc2)cc1C1CCN(C[C@H]2CN([C@@H](C(=O)O)C(C)(C)C)C[C@@H]2c2cccc(F)c2)CC1</chem>        |
| <b>Compound 16</b> | <chem>CCn1nc(Cc2ccc(S(C)(=O)=O)cc2)cc1C1CCN(C[C@H]2CN([C@@H](C(=O)O)C(C)(C)C)C[C@@H]2c2cccc(F)c2)CC1</chem> |
| <b>Compound 17</b> | <chem>Nc1ccc2nc(Cc3ccc(Oc4cccc4)cc3)[nH]c2c1</chem>                                                         |
| <b>Compound 18</b> | <chem>CC(=O)Nc1ccc2nc(Cc3ccc(Oc4cccc4)cc3)[nH]c2c1</chem>                                                   |

**Supplementary Table 5.** The initial node (atom) and edge (bond) information used in RGCN.

| Node(atom) feature    | Size | Description                                                           |
|-----------------------|------|-----------------------------------------------------------------------|
| <b>Atom symbol</b>    | 16   | [B, C, N, O, F, Si, P, S, Cl, As, Se, Br, Te, I, At, metal] (one-hot) |
| <b>degree</b>         | 6    | number of covalent bonds [0,1,2,3,4,5] (one-hot)                      |
| <b>formal charge</b>  | 1    | electrical charge (integer)                                           |
| <b>hybridization</b>  | 6    | [sp, sp2, sp3, sp3d, sp3d2, other] (one-hot)                          |
| <b>aromaticity</b>    | 1    | whether the atom is part of an aromatic system [0/1] (one-hot)        |
| <b>hydrogens</b>      | 5    | number of connected hydrogens [0,1,2,3,4] (one-hot)                   |
| <b>chirality</b>      | 1    | whether the atom is chiral center [0/1] (one-hot)                     |
| <b>chirality type</b> | 2    | [R, S] (one-hot)                                                      |

| Edge (bond) feature | Size | Description                               |
|---------------------|------|-------------------------------------------|
| <b>bond type</b>    | 4    | [single, double, triple, aromatic]        |
| <b>conjugation</b>  | 1    | whether the bond is conjugated [0/1]      |
| <b>ring</b>         | 1    | whether the bond is in ring [0/1]         |
| <b>stereo</b>       | 4    | [StereoNone, StereoAny, StereoZ, StereoE] |

**Supplementary Table 6.** The hyperparameters of different models.

| Model        | Parameters to be optimized                                                       | Package      |
|--------------|----------------------------------------------------------------------------------|--------------|
| ESOL         | the number of nodes of each RGCN hidden layer: [64, 128, <b>256</b> ]            | DGL<br>0.7.1 |
|              | the number of RGCN hidden layer: [ <b>2</b> , 3]                                 |              |
|              | the number of nodes of each FC hidden layer: [ <b>64</b> , 128, 256]             |              |
|              | the dropout rate of each RGCN hidden layer: [0, 0.1, 0.2, 0.3, 0.4, <b>0.5</b> ] |              |
|              | the dropout rate of each FC hidden layer: [0, <b>0.1</b> , 0.2, 0.3, 0.4, 0.5]   |              |
|              | the learning rate: [ <b>0.003</b> , 0.001, 0.0003, 0.0001]                       |              |
|              | the number of epochs: 500<br>the patience of early stop: 30                      |              |
| Mutagenicity | the number of nodes of each RGCN hidden layer: [64, 128, <b>256</b> ]            | DGL<br>0.7.1 |
|              | the number of RGCN hidden layer: [ <b>2</b> , 3]                                 |              |
|              | the number of nodes of each FC hidden layer: [64, <b>128</b> , 256]              |              |
|              | the dropout rate of each RGCN hidden layer: [0, 0.1, 0.2, 0.3, <b>0.4</b> , 0.5] |              |
|              | the dropout rate of each FC hidden layer: [ <b>0</b> , 0.1, 0.2, 0.3, 0.4, 0.5]  |              |

---

|  |                                                           |  |
|--|-----------------------------------------------------------|--|
|  | the learning rate: [0.003, <b>0.001</b> , 0.0003, 0.0001] |  |
|  | the number of epochs: 500                                 |  |
|  | the patience of early stop: 30                            |  |

---

|      |                                                                                  |       |
|------|----------------------------------------------------------------------------------|-------|
|      | the number of nodes of each RGCN hidden layer: [ <b>64</b> , 128, 256]           |       |
|      | the number of RGCN hidden layer: [ <b>2</b> , <b>3</b> ]                         |       |
|      | the number of nodes of each FC hidden layer: [64, <b>128</b> , 256]              |       |
|      | the dropout rate of each RGCN hidden layer: [0, 0.1, <b>0.2</b> , 0.3, 0.4, 0.5] | DGL   |
| hERG | the dropout rate of each FC hidden layer: [0, <b>0.1</b> , 0.2, 0.3, 0.4, 0.5]   | 0.7.1 |
|      | the learning rate: [0.003, 0.001, <b>0.0003</b> , 0.0001]                        |       |
|      | the number of epochs: 500                                                        |       |
|      | the patience of early stop: 30                                                   |       |

---

|      |                                                                                  |       |
|------|----------------------------------------------------------------------------------|-------|
|      | the number of nodes of each RGCN hidden layer: [64, 128, <b>256</b> ]            |       |
|      | the number of RGCN hidden layer: [ <b>2</b> , 3]                                 |       |
|      | the number of nodes of each FC hidden layer: [64, <b>128</b> , 256]              |       |
|      | the dropout rate of each RGCN hidden layer: [0, 0.1, <b>0.2</b> , 0.3, 0.4, 0.5] | DGL   |
| BBBP | the dropout rate of each FC hidden layer: [0, 0.1, 0.2, 0.3, <b>0.4</b> , 0.5]   | 0.7.1 |
|      | the learning rate: [0.003, <b>0.001</b> , 0.0003, 0.0001]                        |       |
|      | the number of epochs: 500                                                        |       |
|      | the patience of early stop: 30                                                   |       |

---

*Bold hyperparameters represent optimized hyperparameters.*

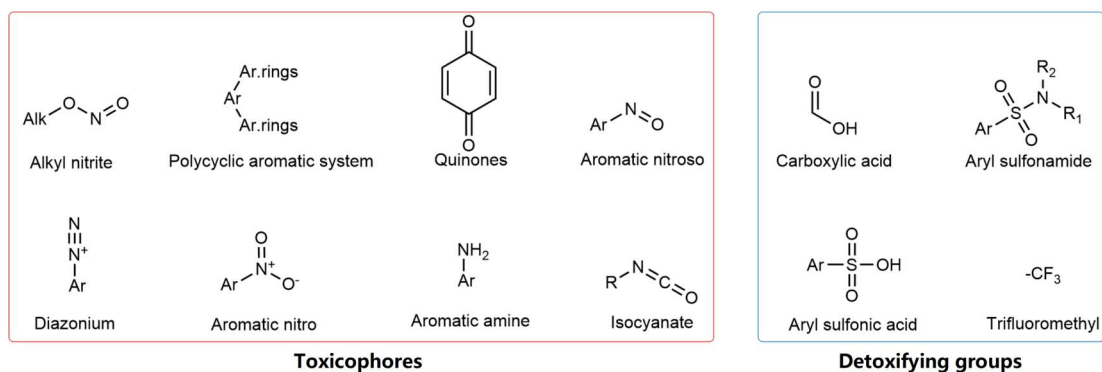

**Supplementary Figure 1.** Some identified toxicophores and detoxifying groups.<sup>2, 5-8</sup> 'Ar' indicates an aromatic atom, 'Alk' indicates an alkyl atom, and 'Ar.rings' indicates an atom that is part of multiple aromatic rings.

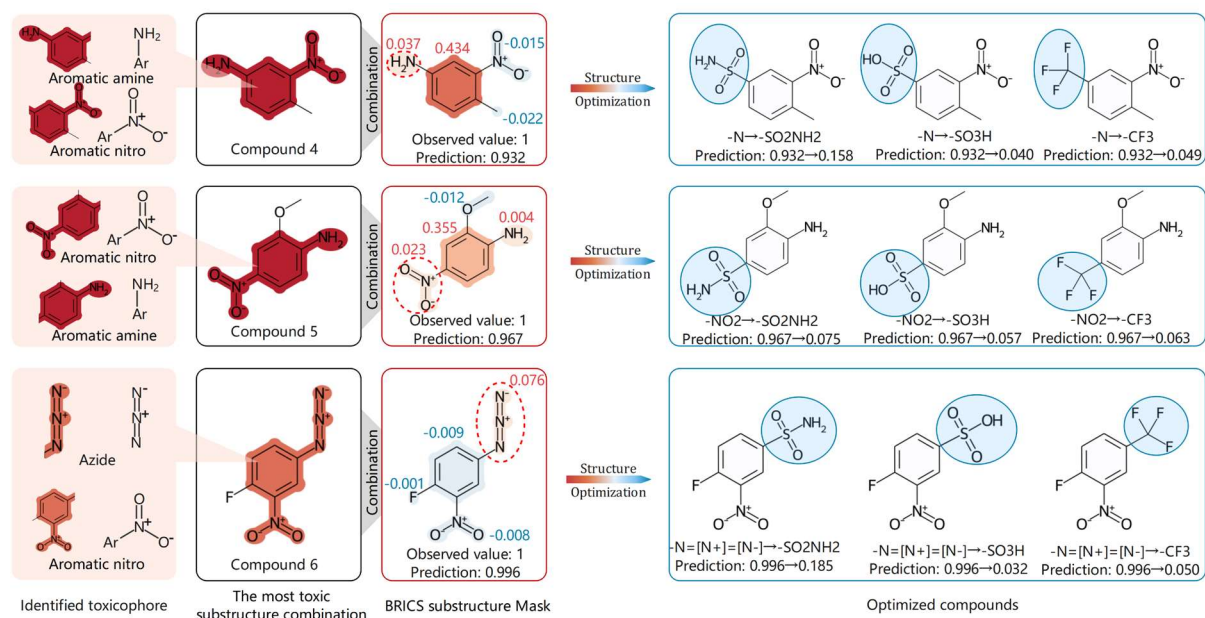

**Supplementary Figure 2.** The attribution visualization and structural optimization of **compounds 4, 5 and 6**; The toxic functional groups in **compounds 4, 5, and 6** (the amino, nitro and isocyanate groups) are changed to detoxifying groups (sulfonyl hydroxide, sulfonamide, and trifluoromethyl).

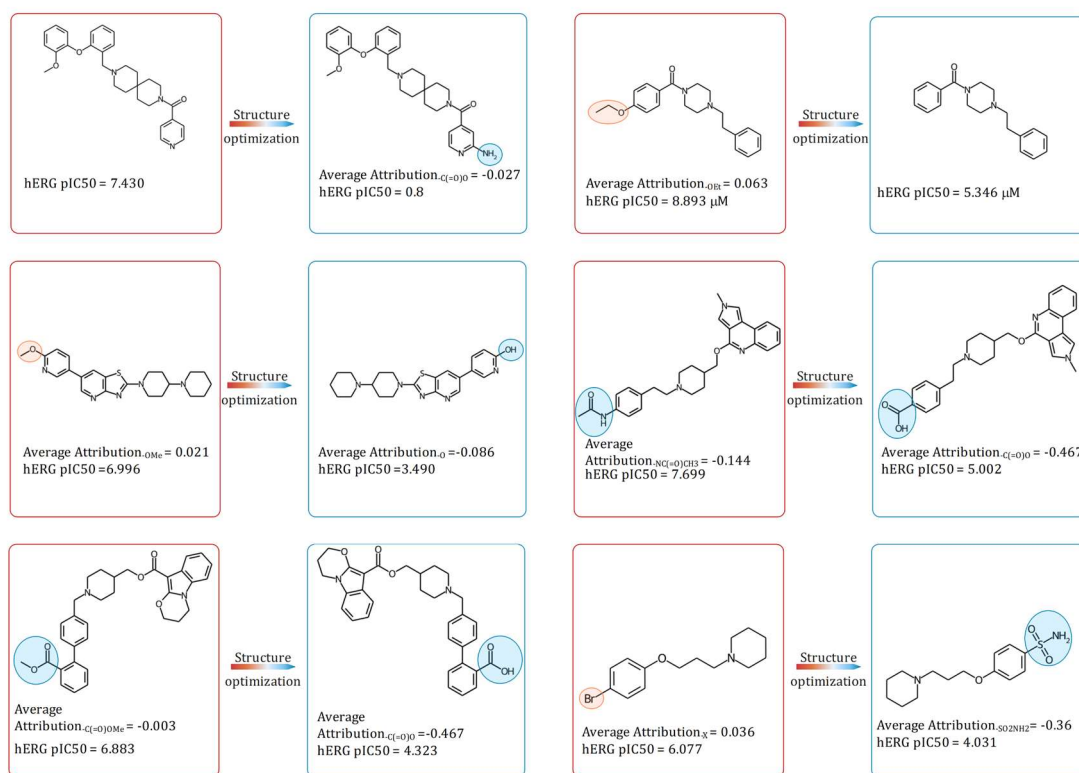

**Supplementary Figure 3.** Some real-world hERG cliff molecular pairs of hERG toxicity.

## Supplementary References

1. Mobley, D. L.; Guthrie, J. P., FreeSolv: a database of experimental and calculated hydration free energies, with input files. *Journal of computer-aided molecular design* **2014**, *28* (7), 711-720.
2. Xu, C.; Cheng, F.; Chen, L.; Du, Z.; Li, W.; Liu, G.; Lee, P. W.; Tang, Y., In silico prediction of chemical Ames mutagenicity. *Journal of Chemical Information and Modeling* **2012**, *52* (11), 2840-2847.
3. Zhang, C.; Zhou, Y.; Gu, S.; Wu, Z.; Wu, W.; Liu, C.; Wang, K.; Liu, G.; Li, W.; Lee, P. W., In silico prediction of hERG potassium channel blockage by chemical category approaches. *Toxicology research* **2016**, *5* (2), 570-582.
4. Xiong, G.; Wu, Z.; Yi, J.; Fu, L.; Yang, Z.; Hsieh, C.; Yin, M.; Zeng, X.; Wu, C.; Lu, A., ADMETlab 2.0: an integrated online platform for accurate and comprehensive predictions of ADMET properties. *Nucleic Acids Research* **2021**, *49* (W1), W5-W14.
5. Wu, Z.; Jiang, D.; Wang, J.; Hsieh, C.-Y.; Cao, D.; Hou, T., Mining toxicity information from large amounts of toxicity data. *Journal of Medicinal Chemistry* **2021**, *64* (10), 6924-6936.
6. Bakhtyari, N. G.; Raitano, G.; Benfenati, E.; Martin, T.; Young, D., Comparison of in silico models for prediction of mutagenicity. *Journal of Environmental Science and Health, Part C* **2013**, *31* (1), 45-66.



7. Hansen, K.; Mika, S.; Schroeter, T.; Sutter, A.; Ter Laak, A.; Steger-Hartmann, T.; Heinrich, N.; Muller, K.-R., Benchmark data set for in silico prediction of Ames mutagenicity. *Journal of chemical information and modeling* **2009**, *49* (9), 2077-2081.
8. Polishchuk, P. G.; Kuz'min, V. E.; Artemenko, A. G.; Muratov, E. N., Universal approach for structural interpretation of QSAR/QSPR models. *Molecular Informatics* **2013**, *32* (9 - 10), 843-853.
